# Supplementary material for: Genetic Association and Expression Studies Indicate a Role of Toll-Like Receptor 8 in Pulmonary Tuberculosis
Source: PLoS Genet. 2008 Oct 10;4(10):e1000218. doi: 10.1371/journal.pgen.1000218 (PMC2568981; doi:10.1371/journal.pgen.1000218)
Supplement: Table S2 — Genotype Distribution of TLR8 Polymorphisms among Indonesian TB Patients and Controls in All and Females. (0.02 MB XLS) [file pgen.1000218.s002.xls]

## Sheet: Sheet1
Table S2.Genotype Distribution of TLR8 Polymorphisms among Indonesian TB Patients and Controls in All and Females
dbSNP ID	Alla	Females
	p-value	1b	2b	3b	p-value
		Case:Control	Case:Control	Case:Control
rs3764879	0.016	78:87	48:56	14:9	0.43
rs3788935	0.019	78:87	48:56	14:9	0.43
rs3761624	0.026	78:87	48:56	14:9	0.43
rs3764880	0.026	78:87	48:56	14:9	0.43
aIndicates the summation of males and females
b(1) Homozygous for the major allele, (2) Heterozygous, (3) Homozygous for the minor allele.
